# Supplementary material for: Reduced hepatic bradykinin degradation accounts for cold-induced BAT thermogenesis and WAT browning in male mice
Source: Springer Nature journal article supplement (doi:10.1038/s41467-023-38141-0), 2023-05-02
Supplement: MOESM1 [file 41467_2023_38141_MOESM1_ESM.pdf]

## Supplementary information for

### Reduced hepatic bradykinin degradation accounts for cold-induced BAT thermogenesis and WAT browning in male mice

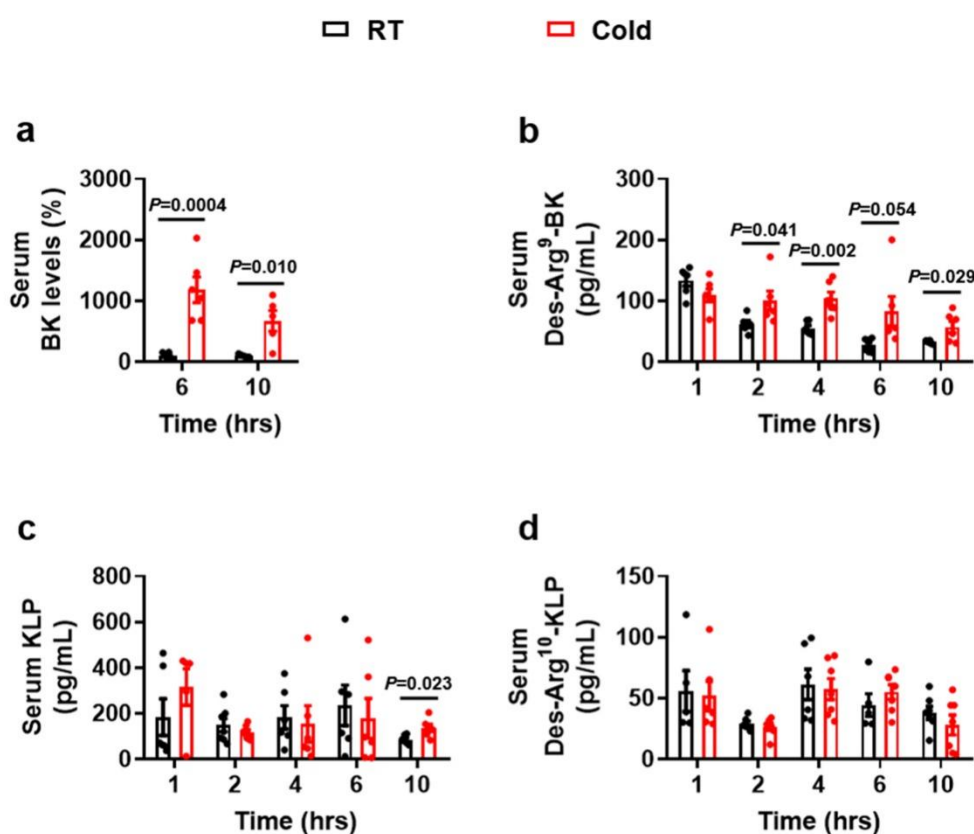

**Supplementary Fig. 1 Serum levels of kinins during acute cold exposure**

Serum levels of BK (a), des-Arg<sup>9</sup>-BK (b), kallidin-like peptide (KLP, Arg-BK) (c) and des-Arg<sup>10</sup>-KLP (d) from male WT mice exposed to 25 °C (RT) or 4 °C (Cold) for different amounts of time in the absence of food and water. BK levels were measured by LC-MS/MS, and other kinins were measured by an ELISA kit. For **a**, n = 6 (RT 6hrs, Cold 6hrs) and 5 (RT 10hrs, Cold 10hrs) mice per group. For **b**, n = 6 in each group. For **c**, n = 6 (RT 1hr, 4hrs, 6hrs, 10hrs; Cold 4hrs, 6hrs, 10hrs), 5 (Cold 1hr) and 7 (RT 2hrs; Cold 2hrs) mice per group. For **d**, n = 5 (RT 1hr, 6hrs), 6 (RT 2hrs,

4hrs; Cold 1hr) and 7 (RT 10hrs; Cold 2hrs, 4hrs, 6hrs, 10hrs) mice per group. Mean  $\pm$  SEM are representative of at least two independent experiments (**a-d**); two-tailed unpaired Student's t-test (**a-d**). Source data are provided as a Source data file.

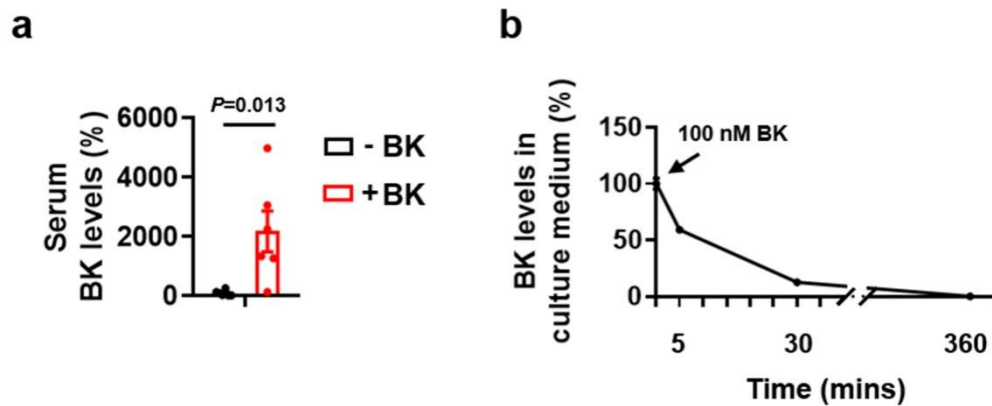

**Supplementary Fig. 2 BK levels in the serum of mice injected with BK and culture medium**

**a** Serum BK levels of male WT mice 5 mins after i.p. injection with a single dose of PBS (-BK) or 1 mg/kg BK (+BK) at 25 °C in the absence of food and water. **b** BK levels in primary brown adipocytes culture medium containing 100 nM BK. The culture medium was sampled after 5, 30 or 360 mins. For **a**,  $n = 6$  in each group. For **b**,  $n = 3$  in each group. BK levels were determined by LC-MS/MS. Mean  $\pm$  SEM are representative of at least two independent experiments (**a, b**); two-tailed unpaired Student's t-test (**a**).

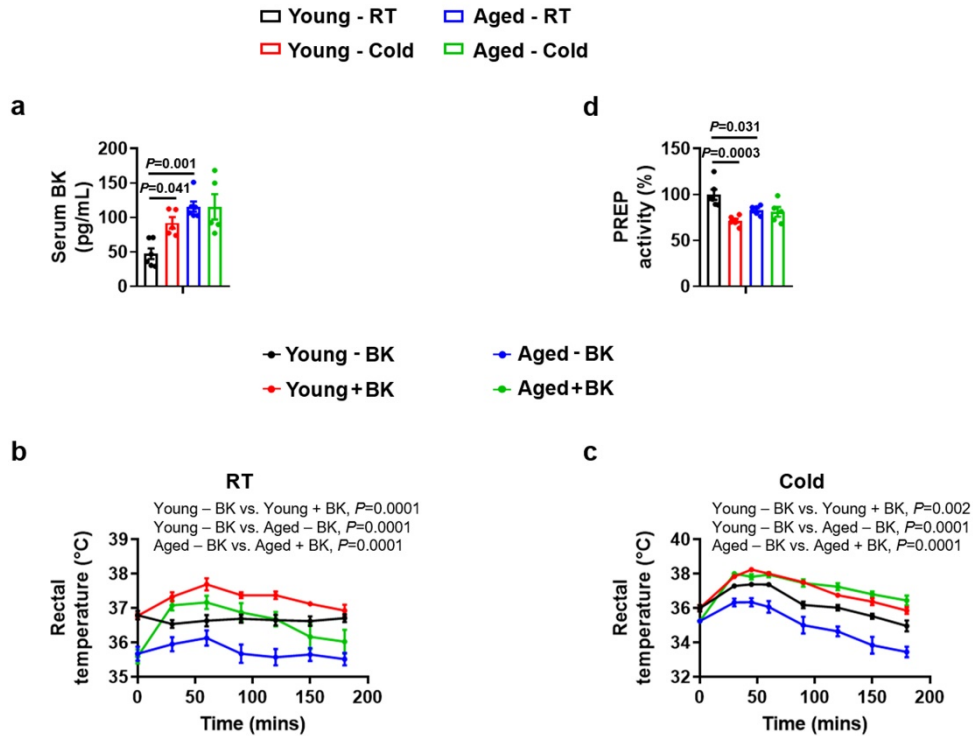

### Supplementary Fig. 3 BK treatment protects against age-induced cold sensitivity

**a, d** Serum BK levels (**a**) and hepatic PREP activity (**d**) of male young (10-week-old) and aged (18-month-old) WT mice exposed to 25 °C (RT) or 4 °C (Cold) for 6 hrs in the absence of food and water. **b, c** Rectal temperature of male young (10-week-old) and aged (18-month-old) WT mice i.p. injected with a single dose of PBS (–BK) or 1 mg/kg BK (+BK) and exposed to 25 °C (RT, **b**) or 4 °C (Cold, **c**) for different amounts of time. The mice were maintained at RT or exposed to cold immediately after injection in the absence of food and water. For **a**,  $n = 6$  in each group under RT;  $n = 5$  in each group under Cold. For **b**,  $n = 7$  (Young–BK, Aged+BK), 6 (Young+BK) and 5 (Aged–BK) mice per group. For **c**,  $n = 5$  (Young–BK, Aged–BK, Aged+BK) and 7 (Young+BK) mice per group. For **d**,  $n = 6$  (Young–RT, Young–Cold, Aged–RT) and 5 (Aged–Cold) mice per group. Mean  $\pm$  SEM are representative of at least two independent experiments (**a-d**); ordinary two-way ANOVA with Tukey's multiple

comparisons test (**a**, **d**), two-way RM ANOVA with Geisser-Greenhouse's correction followed by Tukey's multiple comparisons test (**b**, **c**). Source data are provided as a Source data file.

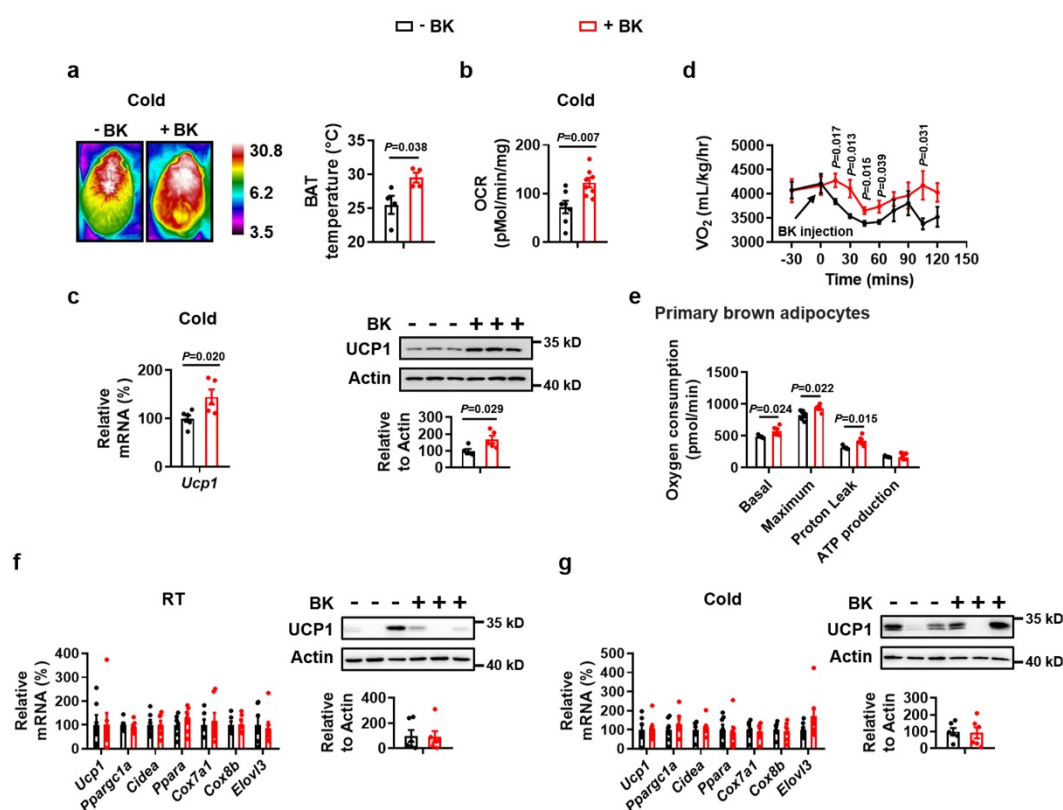

**Supplementary Fig. 4 Effects of one BK injection on BAT thermogenesis and WAT browning**

**a-c** Infrared images (**a**), oxygen consumption rate (OCR, **b**), *Ucp1* mRNA (**c**, **left**) and protein levels (**c**, **right**) of BAT from male WT mice i.p. injected with a single dose of PBS (-BK) or 1 mg/kg BK (+BK) before being exposed to 4 °C (Cold) for 90 mins. **d** Whole-body oxygen consumption of male WT mice i.p. injected with a single dose of PBS (-BK) or 1 mg/kg BK (+BK) at 25 °C. **e** The OCR values of Fig. 2e were normalized to non-mito OCR to accurately quantify the changes in the different

components of mitochondrial respiration. **f** mRNA levels of browning marker genes (**f left**) and UCP1 protein levels (**f right**) in sWAT from male WT mice i.p. injected with a single dose of PBS (–BK) or 1 mg/kg BK (+BK) for 30 mins at 25 °C (RT). **g** mRNA levels of browning marker genes (**g left**) and UCP1 protein levels (**g right**) in sWAT from male WT mice i.p. injected with a single dose of PBS (–BK) or 1 mg/kg BK (+BK) before being exposed to 4 °C (Cold) for 90 mins. The mice in **a**, **b**, **c**, **d**, **f** and **g** were remained at RT or exposed to cold immediately after injection in the absence of food and water. For **a**, n = 4 in each group. For **b**, n = 7 (–BK) and 8 (+BK) mice per group. For **c**, n = 6 (–BK) and 5 (+BK) mice per group (left); n = 5 in each group (right). For **d**, n = 6 in each group. For **e**, n = 5 (–BK) and 6 (+BK) in each group. For **f**, n = 6 (–BK) and 7 (+BK) mice per group (left); n = 6 in each group (right). For **g**, n = 7 (left) and 6 (right) in each group. Mean ± SEM are representative of at least two independent experiments (**a**, **b**, **c**, **d**, **f**, **g**); two-tailed unpaired Student's t-test (**a**, **b**, **c**, **e**, **f**, **g**), two-way RM ANOVA with Geisser-Greenhouse's correction followed by post hoc unpaired t-test (**d**). Source data are provided as a Source data file.

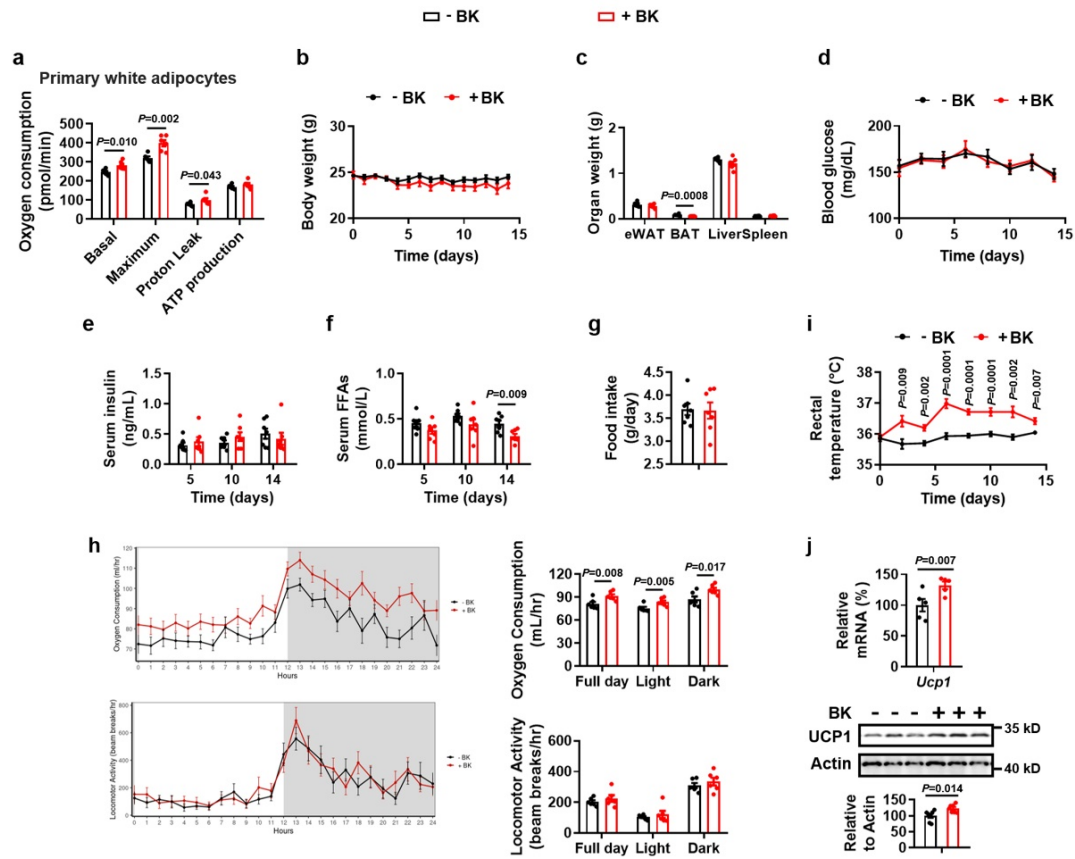

## Supplementary Fig. 5 Physiological parameters of mice treated with BK for 14 days

**a** The oxygen consumption rate (OCR) values of Fig. 3g were normalized to non-mito OCR to accurately quantify the changes in the different components of mitochondrial respiration. **b-j** Body weight (**b**), organ weight (**c**), blood glucose levels (**d**), serum insulin levels (**e**), serum FFAs levels (**f**), food intake (**g**), energy expenditure (**h**), rectal temperature (**i**) and BAT UCP1 expression (**j**) of male WT mice i.p. injected with PBS (–BK) or 1 mg/kg BK (+BK) once a day for 14 days at 25 °C. For **a** and **h**,  $n = 6$  in each group. For **b-g** and **i**,  $n = 7$  in each group. For **j**,  $n = 5$  (up) and 7 (bottom) in each group. Mean  $\pm$  SEM are representative of at least two independent experiments (**b-j**); two-tailed unpaired Student's t-test (**a-g**, **i**, **j**); indirect calorimetry

data (**h**) were analyzed using ANCOVA/Generalized Linear Model with body mass as a covariate in CaIR (version 1.3, <https://calrapp.org/>). Source data are provided as a Source data file.

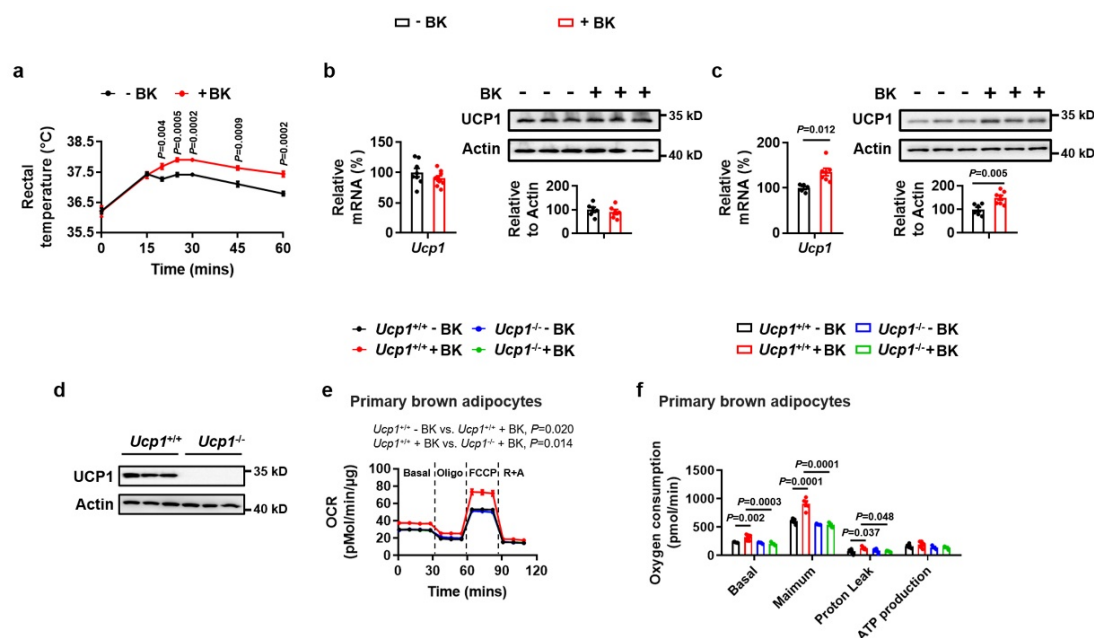

**Supplementary Fig. 6 The effects of BK on body temperature and BAT UCP1 expression**

**a** Rectal temperature in male WT mice i.p. injected with a single dose of PBS (-BK) or 1 mg/kg BK (+BK) at 25 °C in the absence of food and water. **b, c** *Ucp1* mRNA (**left**) and protein levels (**right**) in BAT of male WT mice at 10 min (**b**) and 15 min (**c**) after i.p. injection of a single dose of PBS (-BK) or 1 mg/kg BK (+BK) at 25 °C in the absence of food and water. **d** UCP1 protein levels in BAT of male control (*Ucp1*<sup>+/+</sup>) or *Ucp1* knockout (*Ucp1*<sup>-/-</sup>) mice. **e, f** The oxygen consumption rate (OCR) of primary brown adipocytes from control (*Ucp1*<sup>+/+</sup>) or UCP1 knockout (*Ucp1*<sup>-/-</sup>) mice treated without (-BK) or with (+BK) 0.1 μM BK for 24 hrs; reagents oligomycin (Oligo), carbonyl cyanide 4- (trifluoromethoxy) phenylhydrazone (FCCP), rotenone (R) and

antimycin A (A) were added sequentially as indicated (**e**); the OCR values from **e** were normalized to non-mito OCR to accurately quantify the changes in the different components of mitochondrial respiration (**f**). For **a**, n = 6 per group. For **b**, n=8 (-BK) and 9 (+BK) mice per group (left); n = 6 mice per group (right). For **c**, n = 5 (-BK) and 7 (+BK) mice per group (left); n = 6 (-BK) and 7 (+BK) mice per group (right). For **e** and **f**, n = 5 in each group. Mean  $\pm$  SEM are representative of at least two independent experiments (**a-c**, **e**, **f**); two-way RM ANOVA with Geisser-Greenhouse's correction followed by post hoc unpaired t-test (**a**), two-tailed unpaired Student's t-test (**b**, **c**), two-way RM ANOVA with Geisser-Greenhouse's correction followed by Tukey's multiple comparisons test (**e**); ordinary two-way ANOVA with Tukey's multiple comparisons test (**f**). Source data are provided as a Source data file.



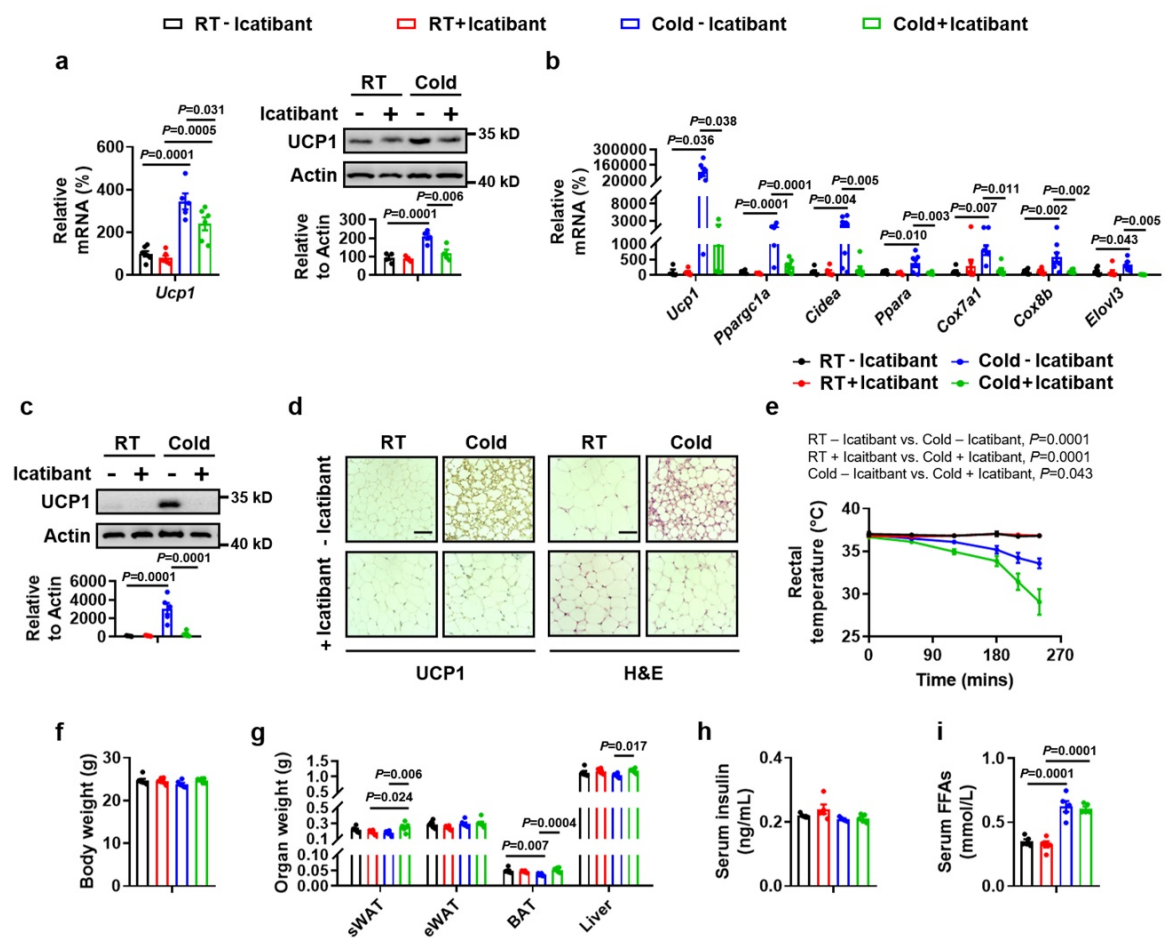

## Supplementary Fig. 7 Effects of icatibant on BAT thermogenesis and WAT browning

Male WT mice received one i.p. injection of PBS (-Icatibant) or 1 mg/kg icatibant (+ Icatibant). The mice were immediately exposed to 4 °C (Cold) or maintained at 25 °C (RT) for 3 hrs after injection in the absence of food and water. *Ucp1* mRNA (**a, left**) and protein levels (**a, right**) in BAT, mRNA levels of browning marker genes (**b**), UCP1 protein levels (**c**), representative immunohistochemistry (IHC) staining of UCP1 (**d, left**), representative H&E staining (**d, right**) in sWAT, body weight (**f**), organ weight (**g**), serum insulin (**h**) and FFAs (**i**) are shown. Scar bars, 50  $\mu$ m (**d**). Rectal temperature at different time point was also examined (**e**). For **a**,  $n = 7$  (RT-

Icatibant), 6 (RT+Icatibant, Cold+Icatibant) and 5 (Cold-Icatibant) mice per group (left); n = 4 in each group (right). For **b**, n = 4 or 7 (RT-Icatibant), 5-7 (RT+Icatibant, Cold-Icatibant) and 4-7 (Cold+Icatibant) mice per group. For **c**, n = 5 in each group. For **e**, n = 5 (RT-Icatibant, Cold-Icatibant, Cold+Icatibant) and 7 (RT+Icatibant) mice per group. For **f** and **g**, n = 6 (RT-Icatibant, RT+Icatibant, Cold-Icatibant) and 7 (Cold+Icatibant) mice per group. For **h** and **i**, n = 5 in each group. Mean  $\pm$  SEM are representative of at least two independent experiments; ordinary two-way ANOVA with Tukey's multiple comparisons test (**a-c**, **f-i**), two-way RM ANOVA with Geisser-Greenhouse's correction followed by Tukey's multiple comparisons test (**e**). Source data are provided as a Source data file.

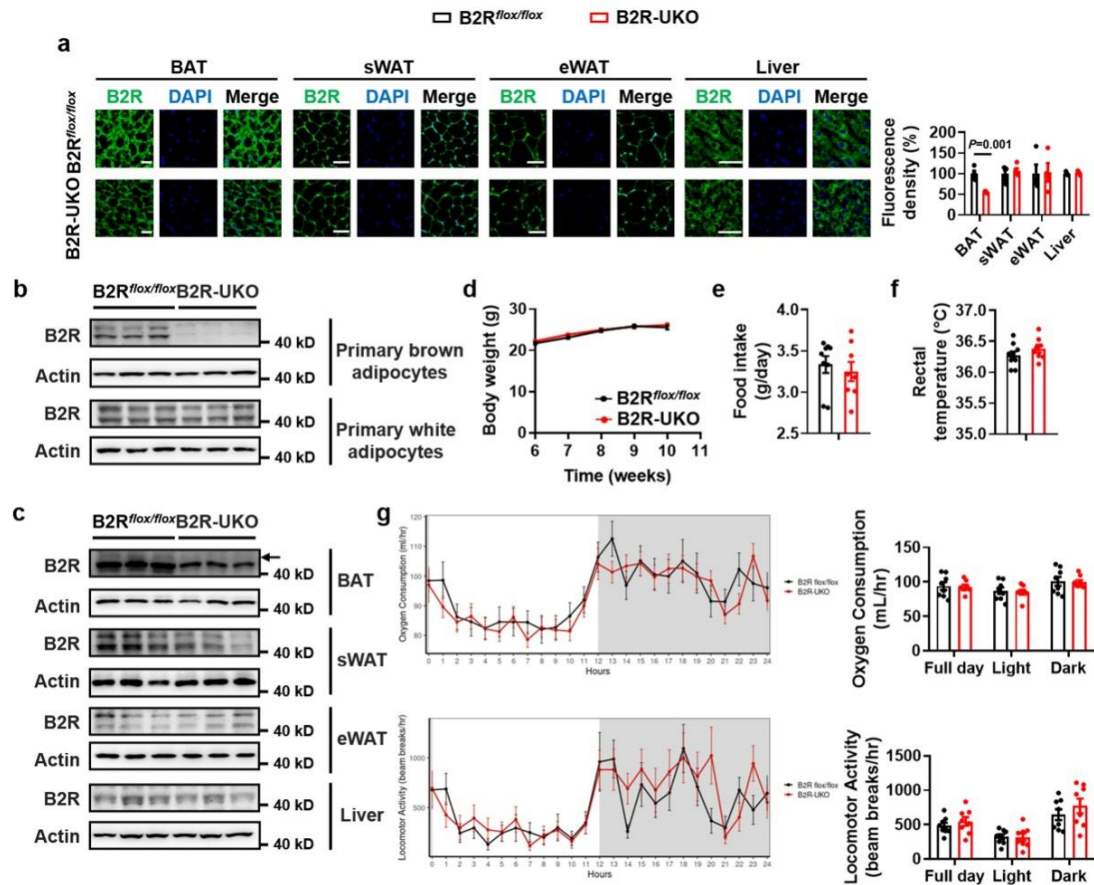

**Supplementary Fig. 8 Physiological parameters of B2R-UKO mice**

**a, d-g** Representative immunofluorescence (IF) staining of bradykinin receptor B2 (B2R) in different tissues (**a**), body weight (**d**), food intake (**e**), rectal temperature (**f**) and energy expenditure (**g**) at 25 °C from male B2R<sup>flx/flx</sup> or B2R-UKO mice. Scale bars, 20 (BAT) or 50 μm (sWAT, eWAT and liver). **b** B2R protein levels in primary brown and white adipocytes of male B2R<sup>flx/flx</sup> and B2R-UKO mice. **c** B2R protein levels in different tissues of B2R<sup>flx/flx</sup> and B2R-UKO mice at 4 °C for 6 hrs. For **a**, n = 4 (B2R<sup>flx/flx</sup> BAT, eWAT; B2R-UKO BAT, eWAT) or 5 (B2R<sup>flx/flx</sup> sWAT, Liver; B2R-UKO sWAT, Liver) mice per group. For **d**, n = 9 in each group. For **e** and **f**, n = 9 (B2R<sup>flx/flx</sup>) and 8 (B2R-UKO) in each group. For **g**, n = 8 in each group. Mean ± SEM are representative of at least two independent experiments (**a-g**); two-tailed

unpaired Student's t-test (**a**, **d**, **e**, **f**); indirect calorimetry data (**g**) were analyzed using ANCOVA/Generalized Linear Model with body mass as a covariate in CaIR (version 1.3, <https://calrapp.org/>). Source data are provided as a Source data file.

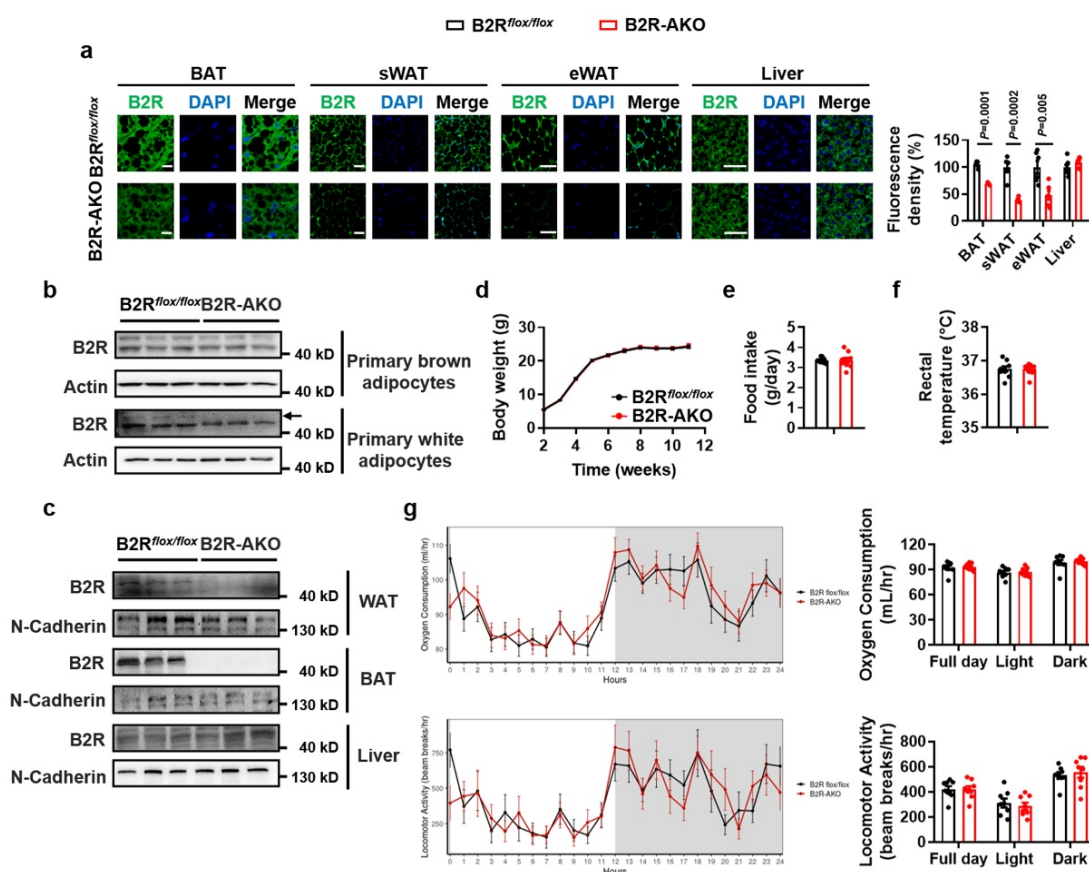

### Supplementary Fig. 9 Physiological parameters of B2R-AKO mice

**a**, **c-g** Representative immunofluorescence (IF) staining of bradykinin receptor B2 (B2R) in different tissues (**a**), B2R levels of membrane proteins extracted from different tissues (**c**), body weight (**d**), food intake (**e**), rectal temperature(**f**) and energy expenditure (**g**) at 25 °C from male B2R<sup>fllox/fllox</sup> or B2R-AKO mice. Scar bars, 20 (BAT) or 50  $\mu$ m (sWAT, eWAT and liver). **b** B2R protein levels in primary brown and white adipocytes of male B2R<sup>fllox/fllox</sup> and B2R-AKO mice. For **a**, n = 5 (BAT, sWAT), 6

(eWAT) and 8 (Liver) mice per group. For **d**,  $n = 3$  (2 weeks) and 6 (3-11 weeks) in  $B2R^{flox/flox}$  group;  $n = 4$  (2 weeks) and 5 (3-11 weeks) in  $B2R$ -AKO group. For **e** and **f**,  $n = 9$  in each group. For **g**,  $n = 8$  in each group. Mean  $\pm$  SEM are representative of at least two independent experiments (**a-g**); two-tailed unpaired Student's t-test (**a**, **d**, **e**, **f**), indirect calorimetry data (**g**) were analyzed using ANCOVA/Generalized Linear Model with body mass as a covariate in CaIR (version 1.3, <https://calrapp.org/>). Source data are provided as a Source data file.

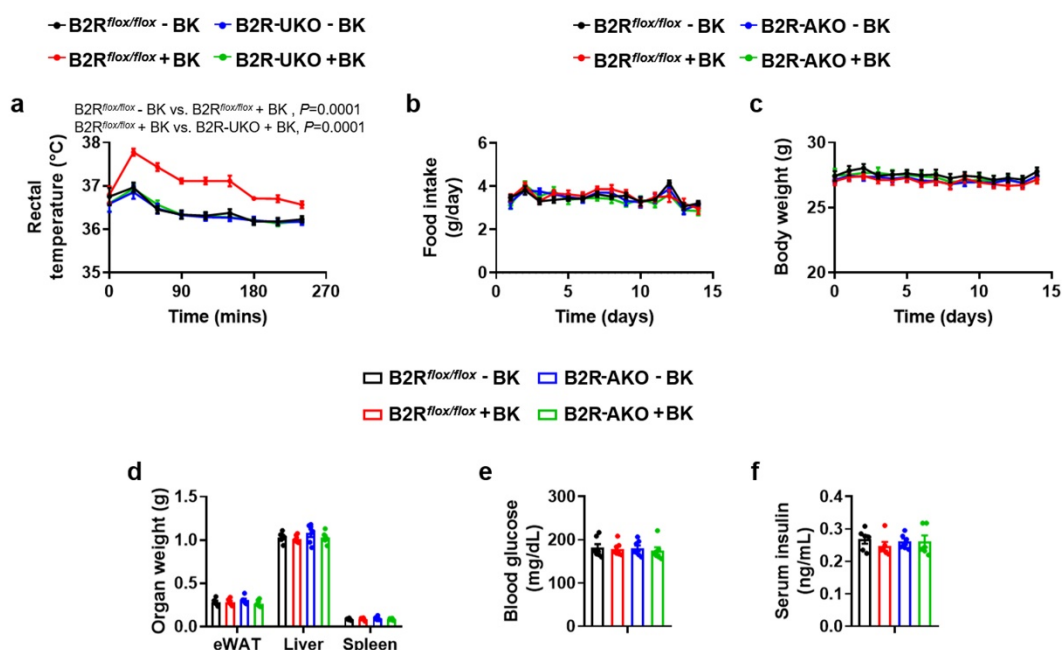

**Supplementary Fig. 10 Physiological parameters of  $B2R$ -UKO and  $B2R$ -AKO mice treated with BK**

**a** Rectal temperature of  $B2R^{flox/flox}$  or  $B2R$ -UKO male mice i.p. injected with a single dose of PBS (-BK) or 1 mg/kg BK (+BK) for different amounts of time at 25 °C in the absence of food and water. **b-f** Food intake (**b**), body weight (**c**), organ weight (**d**), blood glucose levels (**e**), and serum insulin levels (**f**) of male  $B2R^{flox/flox}$  and

B2R-AKO mice i.p. injected with PBS (–BK) or 1 mg/kg BK (+BK) once a day for 14 days at 25 °C. For **a**,  $n = 8$  ( $B2R^{flox/flox}$ –BK) and 9 ( $B2R^{flox/flox}$ +BK, B2R-UKO–BK, B2R-UKO+BK) mice per group. For **b**, **c** and **e**,  $n = 7$  in each group. For **d** and **f**,  $n = 6$  in each group. Mean  $\pm$  SEM are representative of at least two independent experiments (**a-f**). Two-way RM ANOVA with Geisser-Greenhouse's correction followed by Tukey's multiple comparisons test (**a**), ordinary two-way ANOVA with Tukey's multiple comparisons test (**b-f**). Source data are provided as a Source data file.

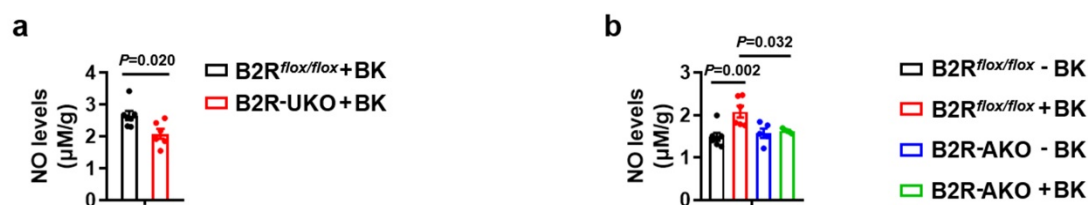

**Supplementary Fig. 11 Nitric oxide (NO) levels in adipose tissue of B2R-UKO and B2R-AKO mice**

**a** NO levels of BAT from  $B2R^{flox/flox}$  or B2R-UKO male mice i.p. injected with a single dose of 1 mg/kg BK after 30 mins at 25 °C in the absence of food and water. **b** NO levels of sWAT from  $B2R^{flox/flox}$  or B2R-AKO male mice i.p. injected with PBS (–BK) or 1 mg/kg BK (+BK) once a day for 14 days at 25 °C. For **a**,  $n = 7$  ( $B2R^{flox/flox}+BK$ ) and 6 ( $B2R-UKO+BK$ ) mice per group. For **b**,  $n = 7$  ( $B2R^{flox/flox}$ –BK), 6 ( $B2R^{flox/flox}+BK$ ) and 5 ( $B2R-AKO$ –BK,  $B2R-AKO+BK$ ) mice per group. Mean  $\pm$  SEM are representative of at least two independent experiments (**a**, **b**); two-tailed unpaired Student's t-test (**a**), ordinary two-way ANOVA with Tukey's multiple

comparisons test (b). Source data are provided as a Source data file.

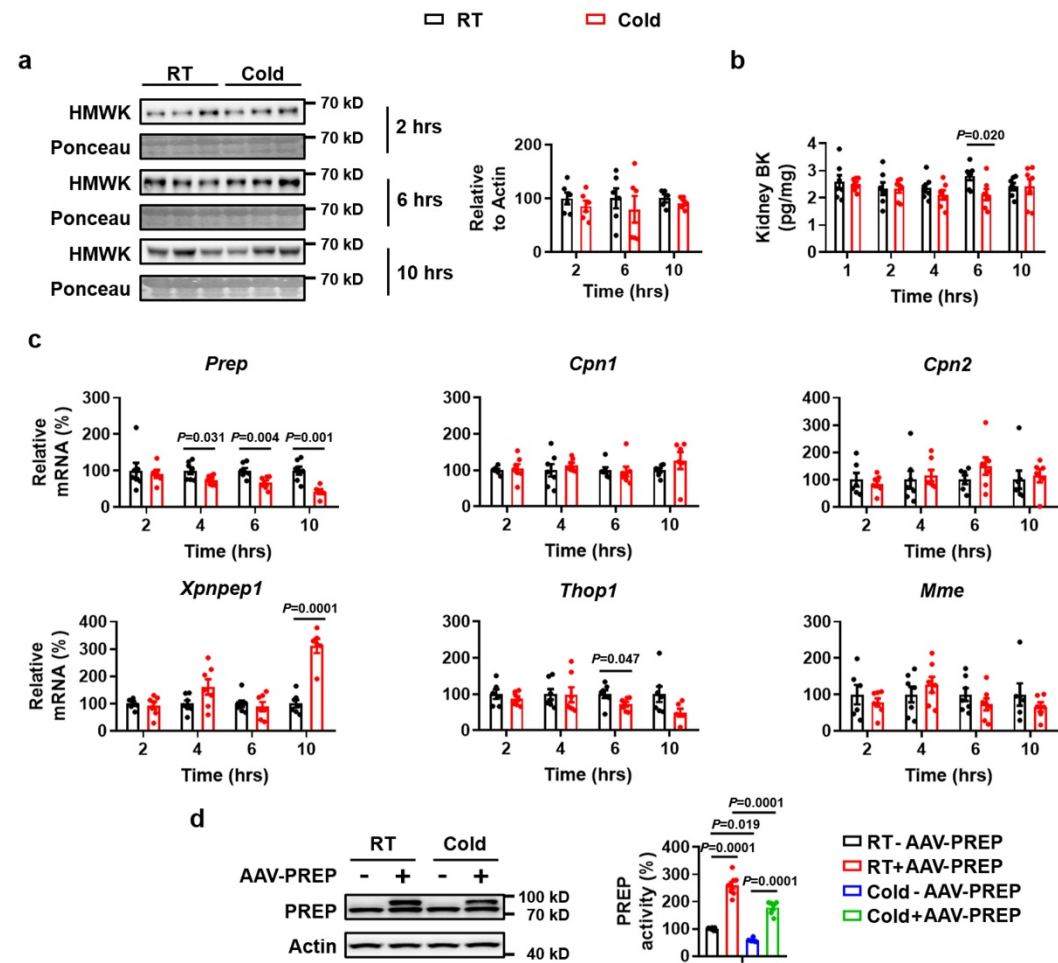

**Supplementary Fig. 12 Effects of acute cold exposure on serum HMWK levels, kidney BK content and hepatic BK-degrading enzymes expression**

**a-c** Serum HMWK levels (a), kidney BK content (b) and hepatic BK-degrading enzymes mRNA levels (c) from male WT mice exposed to 25 °C (RT) or 4 °C (Cold) for different amounts of time in the absence of food and water. **d** Hepatic PREP protein levels (left) and activity (right) from WT male mice infected with (+AAV-PREP) or without (–AAV-PREP) AAV-PREP and exposed to 25 °C (RT) or 4 °C (Cold) for 2 hrs in the absence of food and water. For **a**,  $n = 6$  (RT 2hr, 6hrs;



Cold 2hrs, 6hrs) and 5 (RT 10hrs; Cold 10hrs) mice per group; For **b**, n = 7 in each group. For **c**, n = 6 or 7 in each group. For **d**, n = 7 (RT-AAV-PREP), 8 (RT+AAV-PREP) and 6 (Cold- AAV-PREP, Cold+AAV-PREP) mice per group. Mean  $\pm$  SEM are representative of at least two independent experiments (**a-d**); two-tailed unpaired Student's t-test (**a-c**), ordinary two-way ANOVA with Tukey's multiple comparisons test (**d**). Source data are provided as a Source data file.

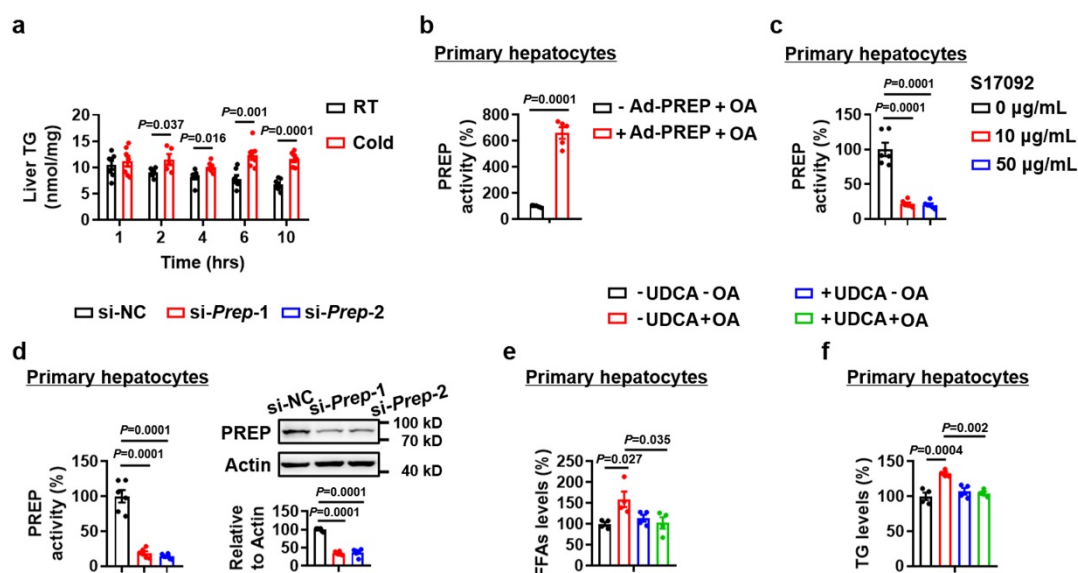

**Supplementary Fig. 13 PREP activity in primary hepatocytes under different treatments**

**a** Triglyceride (TG) levels in the liver of male WT mice exposed to 25 °C (RT) or 4 °C (Cold) for different amounts of time in the absence of food and water. **b** PREP activity in primary hepatocytes infected with (+Ad-PREP) or without (–Ad-PREP) Ad-PREP in the presence (+OA) of 1 mM oleic acid (OA) for 6 hrs. **c** PREP activity in primary hepatocytes treated with 0, 10 or 50  $\mu$ g/mL S17092 for 6 hrs. **d** PREP activity and protein levels in primary hepatocytes transfected with (si-Prep) or



without (si-NC) *Prep* siRNA for 72 hrs. **e, f** Free fatty acids (FFAs, **e**) and TG (**f**) levels in primary hepatocytes treated with (+UDCA) or without (–UDCA) 0.1 mM ursodeoxycholic acid (UDCA) in the absence (–OA) or presence (+OA) of 1 mM OA for 6 hrs. For **a**, n = 7 (RT 1hr, 4hrs, 6hrs, 10hrs; Cold 1hr, 6hrs), 6 (RT 2hrs; Cold 4hrs, 10hrs) and 5 (Cold 2hrs) mice per group. For **b**, n = 5 in each group. For **c** and **d**, n = 6 in each group. For **e** and **f**, n = 4 in each group. Mean  $\pm$  SEM are representative of at least two independent experiments (**a**) or at least three independent experiments (**b-f**); two-tailed unpaired Student's t-test (**a, b**), ordinary one-way ANOVA with Dunnett's test (**c, d**), ordinary two-way ANOVA with Tukey's multiple comparisons test (**e, f**). Source data are provided as a Source data file.

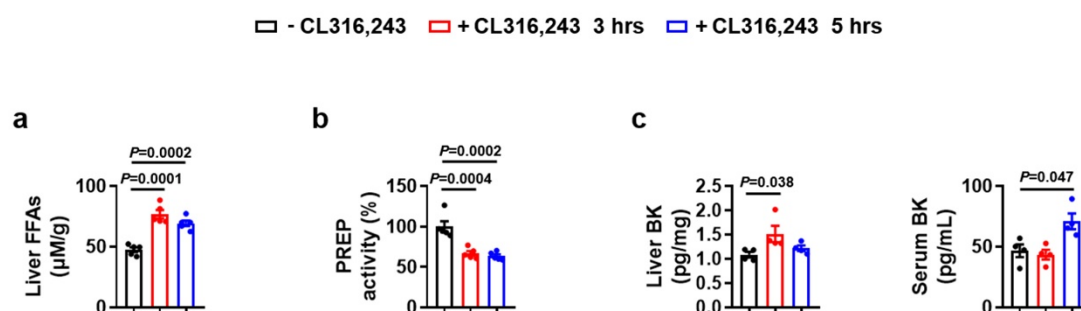

#### Supplementary Fig. 14 Effects of CL316,243 on PREP activity and BK levels

Male WT mice were i.p. injected with a single dose of normal saline (–CL316,243) or 1 mg/kg CL316,243 (+CL316,243) for 3 or 5 hrs in the absence of food and water at 25 °C. **a** Free fatty acids (FFAs) levels in the liver. **b** Hepatic PREP activity. **c** Hepatic and serum BK levels. For **a** and **b**, n = 5 in each group. For **c**, n = 4 in each group. Mean  $\pm$  SEM are representative of at least two independent experiments (**a-c**); ordinary one-way ANOVA with Dunnett's test (**a-c**). Source data are provided as a

Source data file.

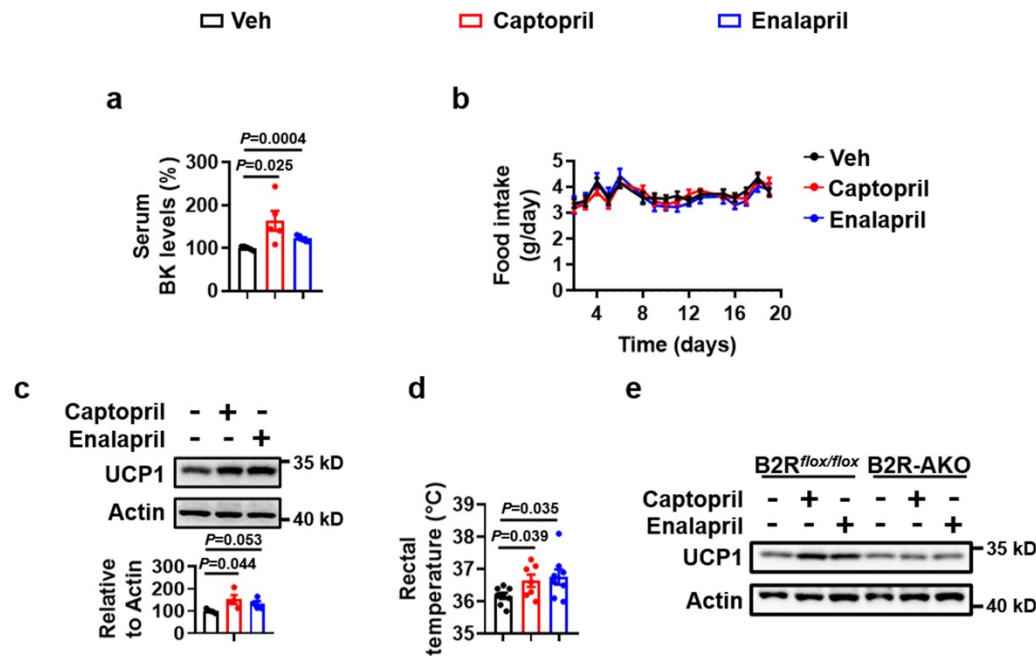

**Supplementary Fig. 15 Effects of ACEIs on food intake and BAT UCP1 expression**

**a-d** Serum BK levels (**a**), food intake (**b**), BAT UCP1 protein levels (**c**), and rectal temperature (**d**) of male WT mice treated with 40 mg/kg captopril or 70 mg/kg enalapril by gavage once a day for 21 days at 25 °C. BK levels were measured by LC-MS/MS (**a**). **e** UCP1 protein levels in BAT of B2R<sup>flox/flox</sup> or B2R-AKO male mice treated with 40 mg/kg captopril or 70 mg/kg enalapril by gavage once a day for 21 days at 25 °C. For **a**, n = 5 in each group. For **b**, n = 8 in each group. For **c**, n = 4 in each group. For **d**, n = 8 (Veh, Enalapril) and 7 (Captopril) mice per group. Mean ± SEM are representative of at least two independent experiments (**a-d**); two-tailed unpaired Student's t-test (**a-d**). Source data are provided as a Source data file.

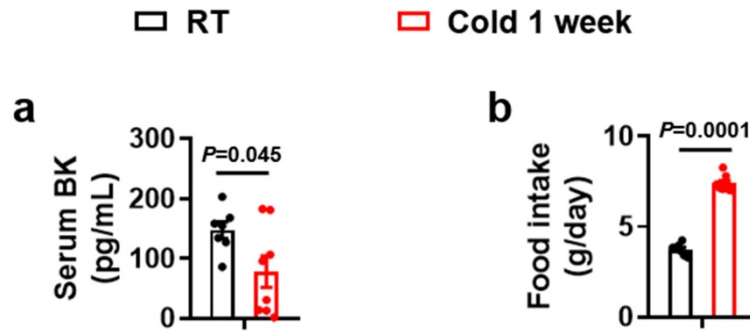

### Supplementary Fig. 16 Impact of chronic cold on circulating BK levels

Serum BK levels (a) and food intake (b) of male WT mice exposed to 25 °C (RT) or 4 °C (Cold) for 1 week in the presence of food and water. For a and b, n = 7 in RT group and n = 8 in Cold group. Mean ± SEM are representative of at least two independent experiments (a, b); two-tailed unpaired Student's t-test. Source data are provided as a Source data file.

### Supplementary Table 1. List of oligonucleotide primer pairs used in RT-qPCR analysis

| Target Gene     | Forward primer (5' – 3') | Reverse primer (5' – 3') |
|-----------------|--------------------------|--------------------------|
| <i>Cidea</i>    | TGCTCTTCTGTATCGCCCAGT    | GCCGTGTTAAGGAATCTGCTG    |
| <i>Cox7a1</i>   | CAGCGTCATGGTCAGTCTGT     | AGAAAACCGTGTGGCAGAGA     |
| <i>Cox8b</i>    | GTTCCAGCAGGATGGGTCTTAG   | TTCATGCTGCGGAGCTCTT      |
| <i>Cpn1</i>     | TCCAAGTTTGTACCCCGGTG     | CTGCGCCCGATGTTGTAGAG     |
| <i>Cpn2</i>     | GTGCTGGGTCTCACTCCTG      | GTTGGGGCTACCGCTGAAA      |
| <i>Elovl3</i>   | GGCACCATCTTTGGCATACTG    | CGTTGTTGTGTGGCATCCTT     |
| <i>Gapdh</i>    | TGTGTCCGTCGTGGATCTGA     | CCTGCTTCACCACCTTCTTGAT   |
| <i>Mme</i>      | CTCTCTGTGCTTGTCTTGCTC    | GACGTTGCGTTTCAACCAGC     |
| <i>Ppara</i>    | TCTGTGGGCTCACTGTTCTG     | AACTACCTGCTCAGGGCTCA     |
| <i>Ppargc1a</i> | GATGGCACGCAGCCCTAT       | CTCGACACGGAGAGTTAAAGGAA  |

|                |                        |                         |
|----------------|------------------------|-------------------------|
| <i>Prep</i>    | ACCTCCGTGCAGGAGTATCAT  | TCTGGGTCTTCAAGCCAAGAATA |
| <i>Thop1</i>   | CAGTGCAGAGGAACATTCTCG  | CACGTCCTGTCTCATGCTCAT   |
| <i>Ucp1</i>    | ACTGCCACACCTCCAGTCATT  | CTTTGCCTCACTCAGGATTGG   |
| <i>Xpnpep1</i> | CGACAAGCTATGAGGAACTCCG | GTCACAGGGTGCAATGTACTC   |
